# Supplementary material
Source: publisher figshare collection journal article supplement (https://sage.figshare.com/ndownloader/files/13438580)
Supplement: Supplementary file 1 [file 13438580]

## **Appendix 2 – Reference list for flow studies in Appendix 1**

- Antola L and Rogers EM (1984) Television Flows in Latin America. *Communication Research* 11(2): 183–202.
- Attallah P (2002) Canadian Television Exports: Into the Mainstream. In: Sinclair J, Jacka E, and Cunningham S (eds), *New patterns in global television: peripheral vision*, Oxford: Oxford Univ. Press.
- Biltereyst D and Meers P (2000) The international telenovela debate and the contra-flow argument: a reappraisal. *Media, Culture & Society* 22(4): 393–413.
- Chadha K and Kavoori A (2000) Media imperialism revisited: some findings from the Asian case. *Media, Culture & Society* 22(4): 415–432.
- Chan JM (2002) Television in Greater China: Structure, Exports, and Market Formation. In: Sinclair J, Jacka E, and Cunningham S (eds), *New patterns in global television: peripheral vision*, Oxford: Oxford Univ. Press.
- Cunningham S and Jacka E (2002) Australian Television in World Markets. In: Sinclair J, Jacka E, and Cunningham S (eds), *New patterns in global television: peripheral vision*, Oxford: Oxford Univ. Press.
- De Bens E and de Smaele H (2001) The Inflow of American Television Fiction on European Broadcasting Channels Revisited. *European Journal of Communication* 16(1): 51–76.
- De Bens E, Kelly M and Bakke M (1992) Television Content: Dallasification of culture? In: Siune K and Truetzschler W (eds), *Dynamics of media politics: broadcast and electronic media in Western Europe*, Sage communications in society, London: Sage Publ, pp. 75–100.
- Dupagne M and Waterman D (1998) Determinants of U.S. television fiction imports in Western Europe. *Journal of Broadcasting & Electronic Media* 42(2): 208–220.
- Fu WW (2006) Concentration and Homogenization of International Movie Sources: Examining Foreign Film Import Profiles. *Journal of Communication* 56(4): 813–835.
- Fu WW and Sim C (2010) Examining International Country-to-Country Flow of Theatrical Films. *Journal of Communication* 60(1): 120–143.
- Jayakar KP and Waterman D (2000) The Economics of American Theatrical Movie Exports: An Empirical Analysis. *Journal of Media Economics* 13(3): 153–169.
- Katz E and Wedell EG (1977) *Broadcasting in the Third World: promise and performance*. Cambridge: Harvard University Press.
- La Pastina AC and Straubhaar JD (2005) Multiple Proximities between Television Genres and Audiences: The Schism between Telenovelas' Global Distribution and Local Consumption. *International Communication Gazette* 67(3): 271–288.

- Lee B and Bae H-S (2004) The Effect of Screen Quotas on the Self-Sufficiency Ratio in Recent Domestic Film Markets. *Journal of Media Economics* 17(3): 163–176.
- Lee FLF (2006) Cultural Discount and Cross-Culture Predictability: Examining the Box Office Performance of American Movies in Hong Kong. *Journal of Media Economics* 19(4): 259–278.
- Lee S (2007) A Longitudinal Analysis of Foreign Program Imports on South Korean Television, 1978–2002: A Case of Rising Indigenous Capacity in Program Supply. *Journal of Broadcasting & Electronic Media* 51(1): 172–187.
- Lee S-W (2002) An Economic Analysis of the Movie Industry in Japan. *Journal of Media Economics* 15(2): 125–139.
- Liebes T and Katz E (1990) *The Export of meaning: cross-cultural readings of Dallas*. New York u.a: Oxford Univ.Pr.
- Lozano J-C (2011) Consumption of US television and films in Northeastern Mexico. *International Communication Gazette* 73(8): 685–705.
- Nordenstreng K and Varis T (1974) *Television traffic--a one-way street? A survey and analysis of the international flow of television programme material. Reports and papers on mass communication*, Paris: Unesco.
- Oh J (2001) International Trade in Film and the Self-Sufficiency Ratio. *Journal of Media Economics* 14(1): 31–44.
- Pendakur M and Subramanyam R (2002) India. Part I: Indian Cinema Beyond National Borders. In: Sinclair J, Jacka E, and Cunningham S (eds), *New patterns in global television: peripheral vision*, Oxford: Oxford Univ. Press.
- Pragnell A (1985) *Television in Europe: quality and values in a time of change*. Media monograph, Manchester: European Inst. for the Media.
- Silj A (1988) *East of Dallas: the Europ. challenge to American television*. London: British Film Inst.
- Straubhaar JD (2007) *World television: from global to local*. Los Angeles: Sage.
- Varis T (1985) *International flow of television programmes. Reports and papers on mass communication*, Paris, France : Ann Arbor, MI: Unesco ; UNIPUB [distributor].
- Waterman D and Jayakar KP (2000) The Competitive Balance of the Italian and American Film Industries. *European Journal of Communication* 15(4): 501–528.
- Waterman D and Rogers EM (1994) The Economics of Television Program Production and Trade in Far East Asia. *Journal of Communication* 44(3): 89–111.
- Xu X, Fu WW and Straubhaar JD (2013) National Self-Sufficiency in Broadcast Television Programming: Examining the Airtime Shares of Homemade versus U.S.-Made Programs. *Journal of Broadcasting & Electronic Media* 57(4): 543–561.
